# Supplementary material
Source: Research Square preprint supplement (doi:10.21203/rs.3.rs-9214370/v1)
Supplement: Supplementary file 1 [file e380157b4ddac6d3d7eab556.pdf]

1 **Comparison of capillary microsampling and venous blood for multi-pathogen serosurveillance**

2 **Supplementary Figures**

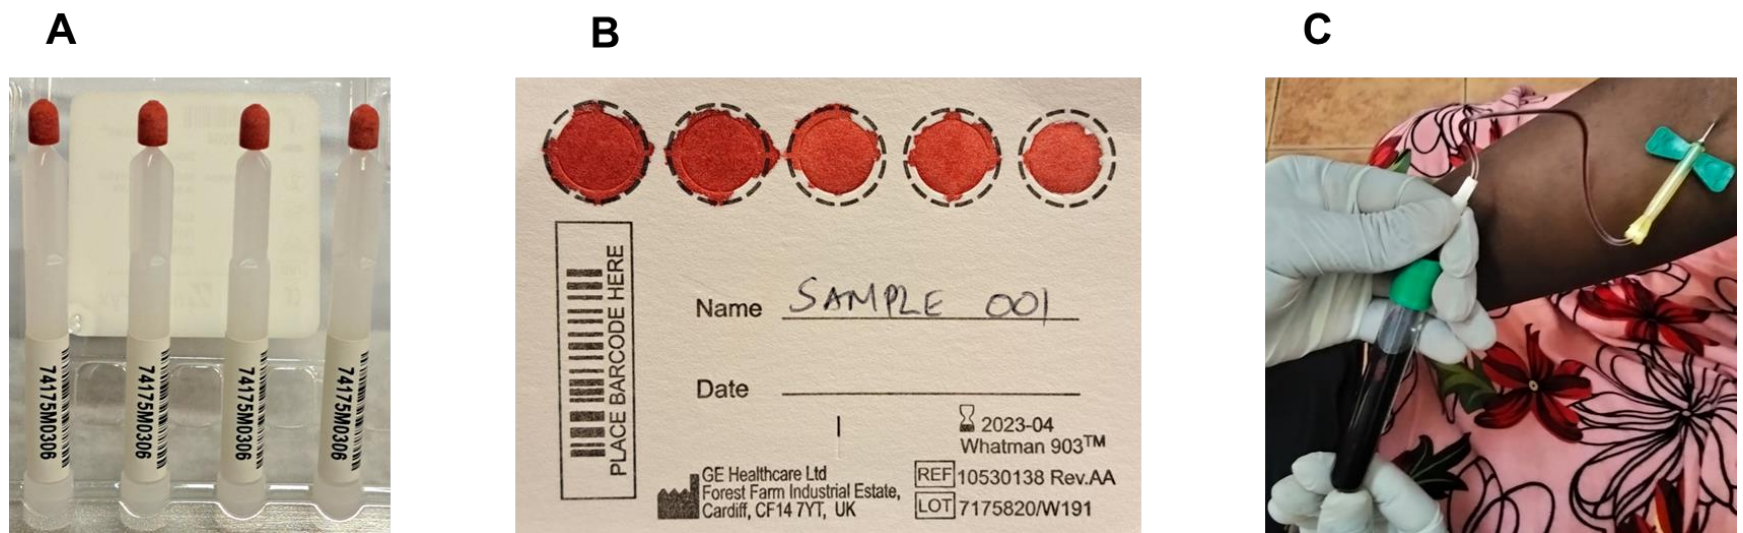

4 **Figure S1:** Blood sample collection tools used in the study: (A) Mitra® microsampling devices with blood samples collected via finger  
 5 prick. (B) Whatman 903 filter paper card spotted with dried blood for DBS collection. (C) Venous blood collection performed using  
 6 BD Vacutainer® sodium heparin tubes. Capillary blood was collected through a finger prick, while venous blood was drawn via standard  
 7 venipuncture.

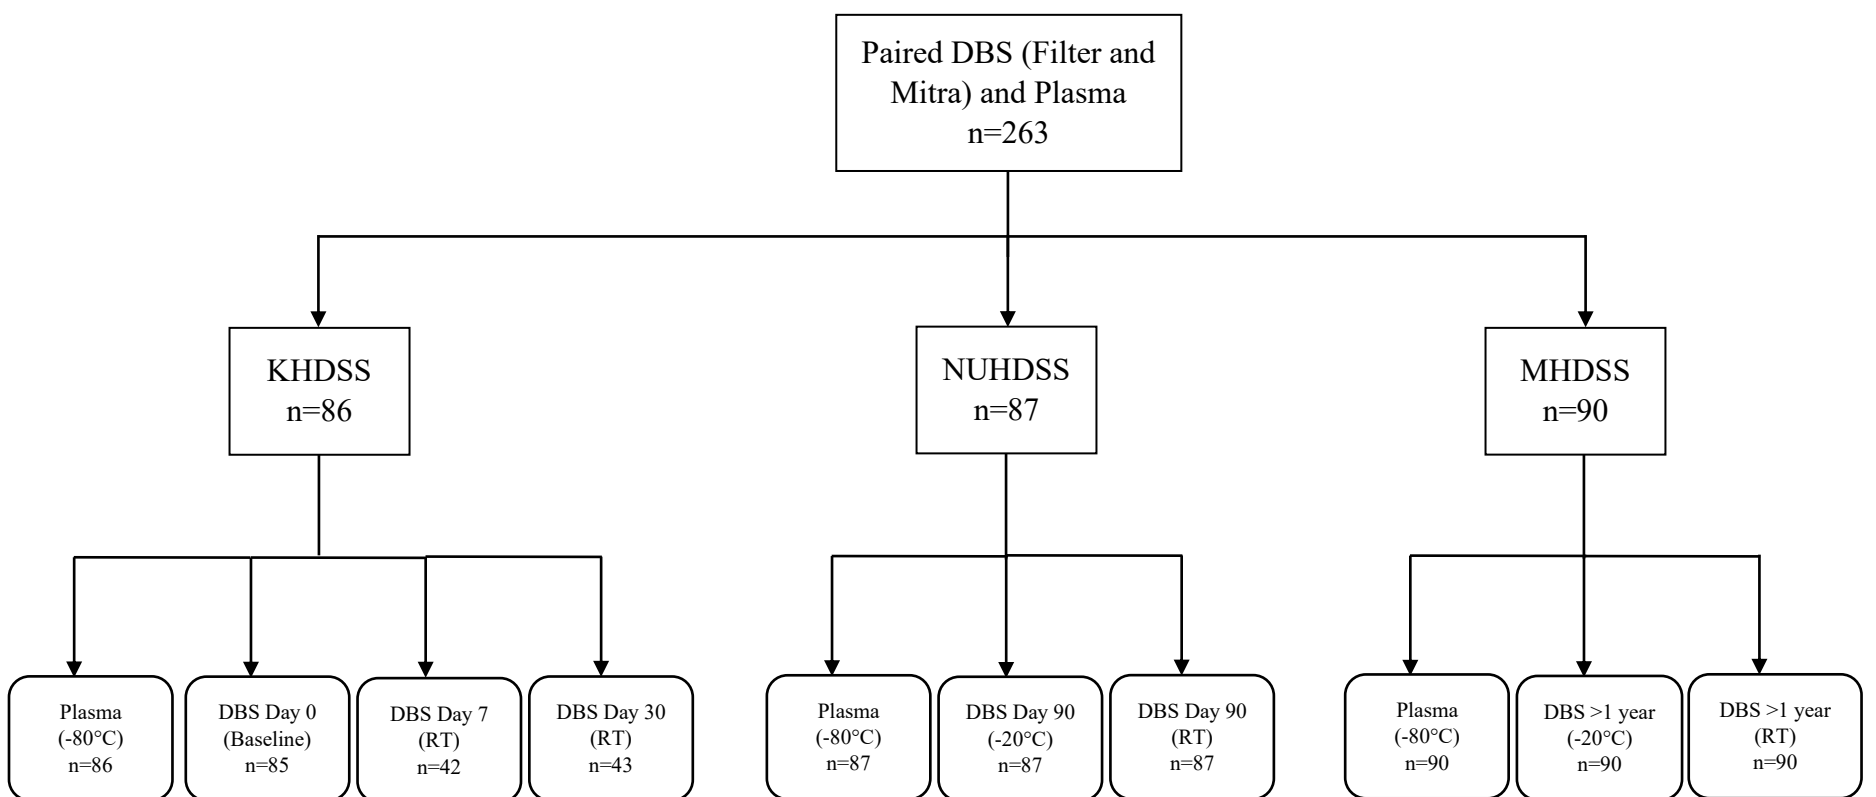

**Figure S2:** Collection of paired plasma and DBS samples using filter paper and Mitra devices. The DBS sample sizes collected from Kilifi (KHDSS), Nairobi Urban (NUHDSS) and Manyatta (MHDSS) sites are shown, along with storage conditions (room temperature (RT) or frozen) and corresponding elution time points for immunoassay analysis.

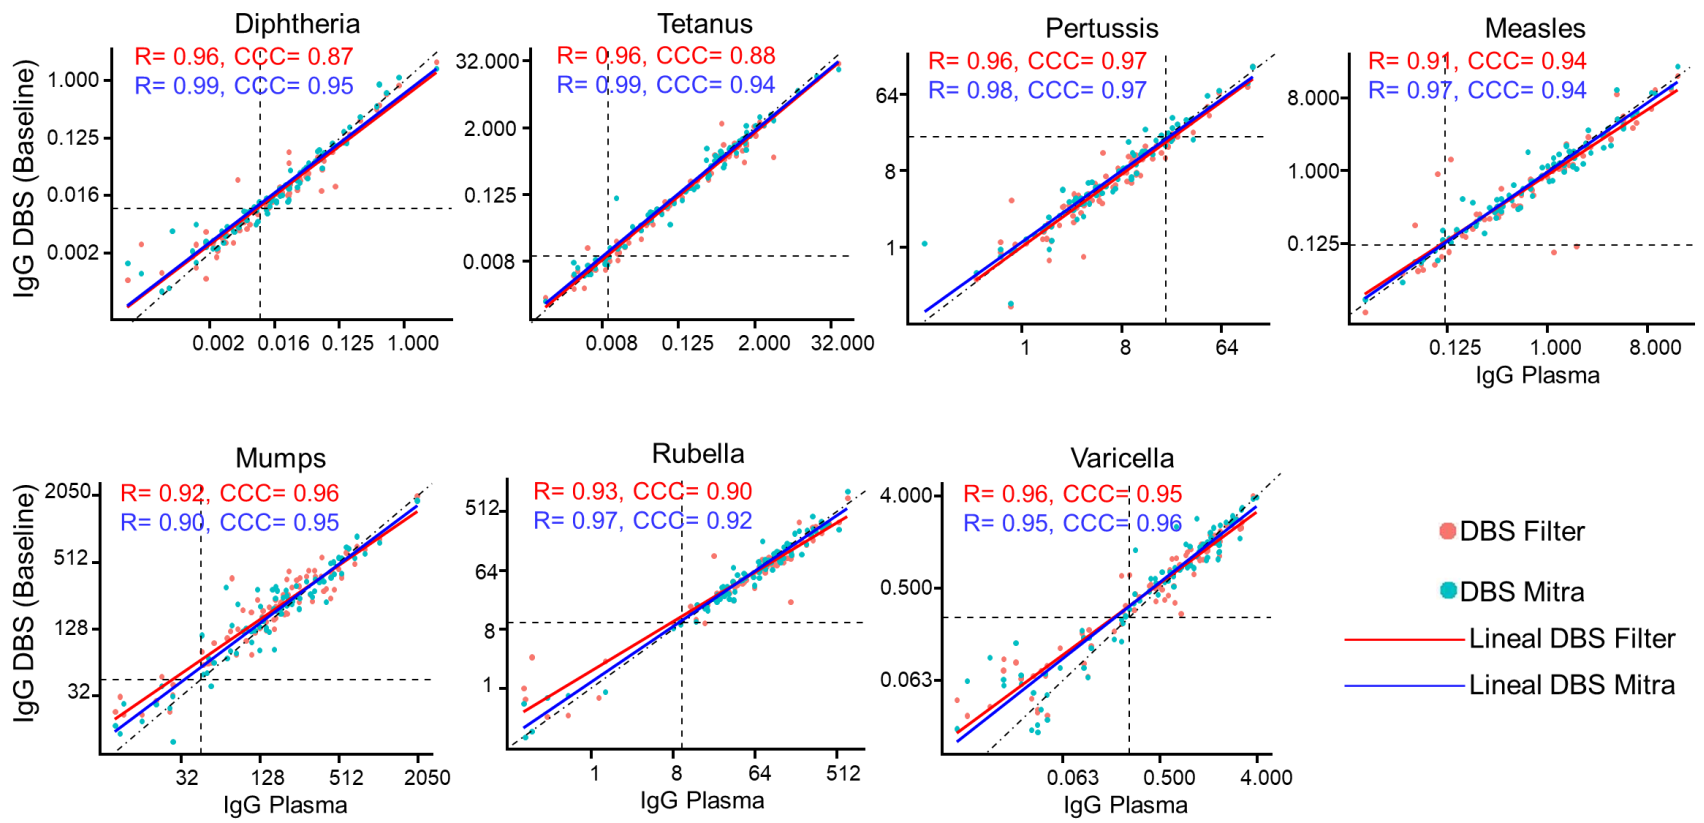

24

25 **Figure S3:** Comparison of IgG antibody levels in DBS samples at baseline (day 0) with matched plasma. Correlation analysis of IgG  
 26 concentrations in baseline DBS filter paper (red) and Mitra (blue) samples relative to plasma. The dotted diagonal line represents the  
 27 reference lines ( $x=y$ ), while the horizontal and vertical black dashed lines indicate the pathogen-specific seropositivity cut-off thresholds.  
 28 Corresponding Pearson correlation coefficients (R) and concordance correlation coefficients (CCC) are shown.

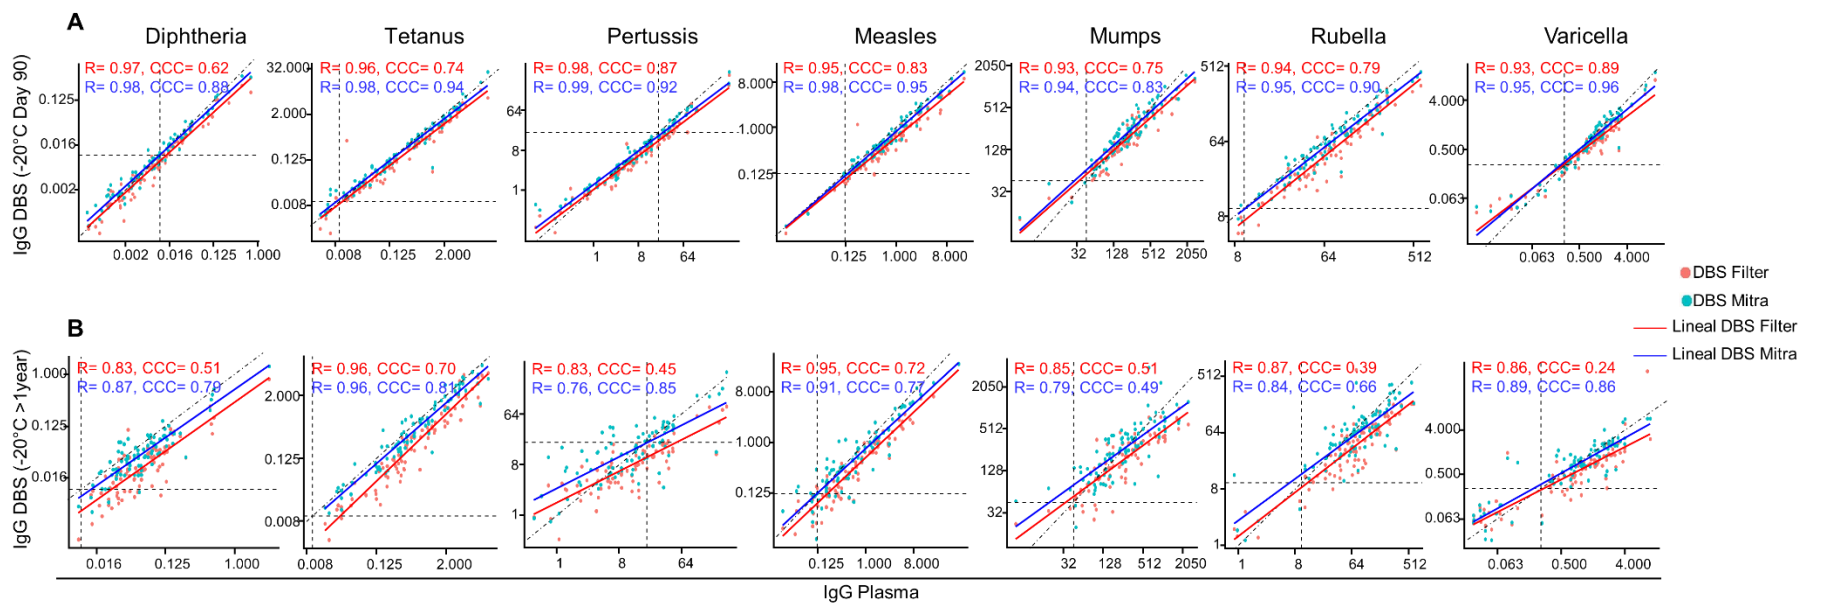

29

30 **Figure S4:** Comparison of IgG antibody levels in DBS samples stored at  $-20^{\circ}\text{C}$  relative to matched plasma samples. Correlation plots  
 31 showing IgG concentrations quantified in DBS filter paper (red points and regression lines) and DBS Mitra (blue) compared with plasma  
 32 for seven analytes: diphtheria, tetanus, pertussis, measles, mumps, rubella, and varicella. The diagonal dotted line represents the  $x = y$   
 33 reference line. Horizontal and vertical black dashed lines indicate analyte-specific seropositivity cut-off thresholds. Panel (A) shows  
 34 results from samples stored for 90 days, while panel (B) presents results from samples stored for  $>1$  year. Pearson correlation coefficients  
 35 (R) and concordance correlation coefficients (CCC) for each analyte and sample type are shown.

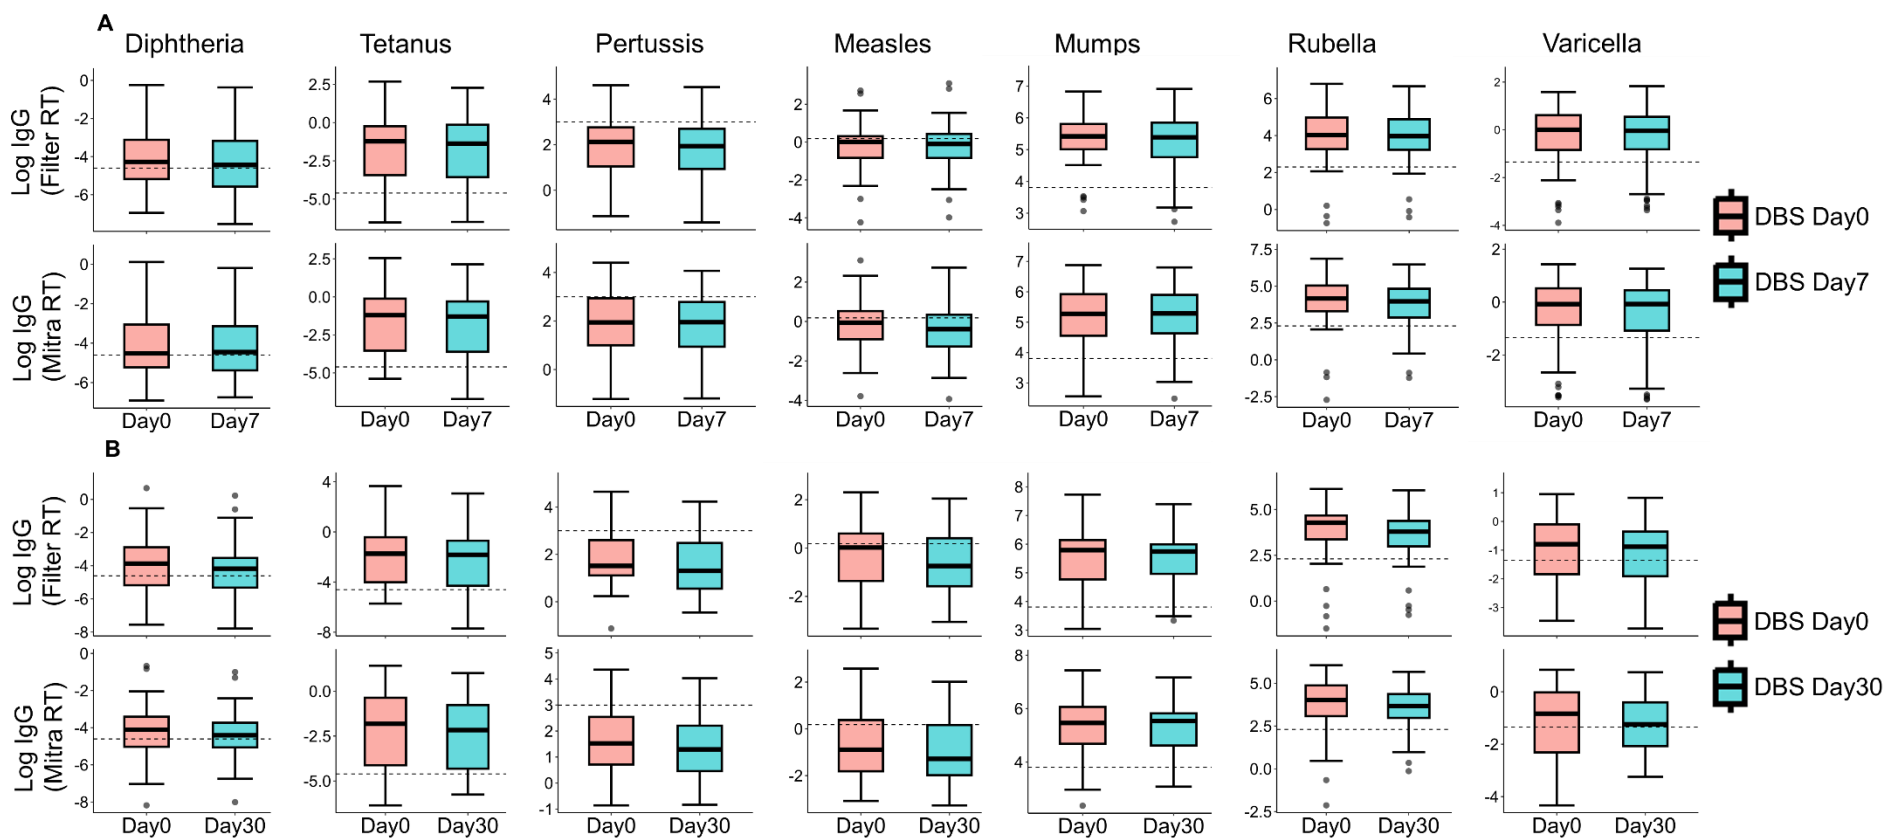

36

**Figure S5:** Analysis of IgG antibody levels in DBS samples stored at room temperature (RT) across various time points. Log-  
 transformed antibody concentrations from DBS filter (upper panel) and Mitra (lower panel) eluates at RT day 7 (A) and at day 30 (B)  
 compared with paired plasma levels. The line in each box represents the median, and the box shows the interquartile range (IQR).  
 Whiskers indicate the range excluding outliers ( $>1.5 \times \text{IQR}$ ). Black dotted lines mark pathogen-specific seropositivity cutoffs.

37 **Supplementary Tables**38 **Table S1:** Sensitivity and Specificity of DBS filter and Mitra at baseline (Day 0) relative to plasma IgG responses

| Analyte    | DBS Filter Sensitivity | DBS Filter Specificity | DBS Mitra Sensitivity | DBS Mitra Specificity |
|------------|------------------------|------------------------|-----------------------|-----------------------|
| Diphtheria | 100% (93.2–100)        | 93.9% (79.8–99.3)      | 96.2% (86.8–99.5)     | 93.9% (79.8–99.3)     |
| Tetanus    | 95.8% (88.6–99.1)      | 92.3% (64.0–99.8)      | 98.6% (92.5–100)      | 100% (75.3–100)       |
| Pertussis  | 72.2% (46.5–90.3)      | 100% (94.6–100)        | 77.8% (52.4–93.6)     | 97.0% (89.6–99.6)     |
| Measles    | 96.0% (88.6–99.2)      | 72.7% (39.0–94.0)      | 100% (95.1–100)       | 72.7% (39.0–94.0)     |
| Mumps      | 100% (95.3–100)        | 89.0% (51.8–99.7)      | 98.7% (92.9–100)      | 100% (66.4–100)       |
| Rubella    | 100% (95.2–100)        | 70.0% (34.8–93.3)      | 100% (95.3–100)       | 88.9% (51.8–99.7)     |
| Varicella  | 100% (93.7–100)        | 89.3% (71.8–97.7)      | 100% (93.7–100)       | 96.4% (81.7–99.9)     |

39

40 **Table S2:** Sensitivity and Specificity of DBS filter and Mitra at stored at -20°C for 90 days relative to plasma IgG responses

| Analyte    | DBS Filter Sensitivity | DBS Filter Specificity | DBS Mitra Sensitivity | DBS Mitra Specificity |
|------------|------------------------|------------------------|-----------------------|-----------------------|
| Diphtheria | 90.9% (75.7–98.1)      | 100% (93.4–100)        | 93.9% (79.8–99.3)     | 94.4% (84.6–98.8)     |
| Tetanus    | 100% (95.4–100)        | 87.5% (47.4–99.7)      | 100% (95.4–100)       | 62.5% (24.5–91.5)     |
| Pertussis  | 62.5% (40.6–81.2)      | 100% (94.6–100)        | 87.5% (67.6–97.3)     | 100% (94.3–100)       |
| Measles    | 93.8% (86.2–98.0)      | 100% (54.1–100)        | 96.3% (89.6–99.2)     | 83.3% (35.9–99.6)     |
| Mumps      | 100% (95.7–100)        | 75% (19.4–99.4)        | 100% (95.7–100)       | 100% (39.8–100)       |
| Rubella    | 98.8% (93.5–100)       | 100% (29.2–100)        | 100% (95.7–100)       | 66.7% (9.4–99.2)      |
| Varicella  | 97.2% (90.3–99.7)      | 97.2% (90.3–99.7)      | 97.2% (90.3–99.7)     | 93.3% (68.1–99.8)     |

41

42 **Table S3:** Sensitivity and Specificity of DBS filter and Mitra at stored at -20°C for >1 year relative to plasma IgG responses.

| Analyte    | DBS Filter Sensitivity | DBS Filter Specificity | DBS Mitra Sensitivity | DBS Mitra Specificity |
|------------|------------------------|------------------------|-----------------------|-----------------------|
| Diphtheria | 77.0% (66.8–85.4)      | 100% (2.5–100.0)       | 95.4% (88.5–98.7)     | 100% (2.5–100.0)      |
| Tetanus    | 97.6% (90.4–99.3)      | N/A (0.0–100.0)        | 100.0% (95.9–100.0)   | N/A (0.0–100.0)       |
| Pertussis  | 33.3% (18.0–51.8)      | 100% (93.5–100.0)      | 71.9% (53.3–86.3)     | 85.5% (73.3–93.5)     |
| Measles    | 81.6% (71.0–89.6)      | 91.2% (61.5–99.8)      | 92.1% (83.6–97.1)     | 63.6% (30.1–89.1)     |
| Mumps      | 91.8% (83.8–96.6)      | 100% (29.2–100.0)      | 97.6% (91.7–99.7)     | 0.0% (0.0–70.8)       |
| Rubella    | 96.4% (89.8–99.3)      | 100.0% (47.8–100.0)    | 100.0% (95.6–100.0)   | 80.0% (28.4–99.5)     |
| Varicella  | 90.1% (80.7–95.9)      | 94.1% (71.3–99.9)      | 98.6% (92.3–100.0)    | 88.2% (63.6–98.5)     |

43

44 **Table S4:** Sensitivity and Specificity of DBS filter and Mitra at Day 7 room temperature storage relative to Day 0 time point IgG responses  
45

| Analyte    | DBS Filter Sensitivity | DBS Filter Specificity | DBS Mitra Sensitivity | DBS Mitra Specificity |
|------------|------------------------|------------------------|-----------------------|-----------------------|
| Diphtheria | 95.2% (76.2–99.9)      | 100% (82.4–100)        | 95.5% (77.2–99.9)     | 100% (81.5–100)       |
| Tetanus    | 97.1% (84.7–99.9)      | 83.3% (35.9–99.6)      | 100% (89.7–100)       | 100% (54.1–100)       |
| Pertussis  | 71.4% (29.0–96.3)      | 100% (89.4–100)        | 66.7% (29.9–92.5)     | 100% (88.8–100)       |
| Measles    | 100% (90.0–100)        | 80.0% (28.4–99.5)      | 97.3% (85.8–99.9)     | 100% (29.2–100)       |
| Mumps      | 97.2% (85.5–99.9)      | 100% (39.8–100)        | 100% (90.3–100)       | 100% (39.8–100)       |
| Rubella    | 97.2% (85.5–99.9)      | 100% (39.8–100)        | 97.2% (85.5–99.9)     | 100% (39.8–100)       |

|           |                 |                 |                   |                 |
|-----------|-----------------|-----------------|-------------------|-----------------|
| Varicella | 100% (89.1–100) | 100% (63.1–100) | 96.9% (83.8–99.9) | 100% (63.1–100) |
|-----------|-----------------|-----------------|-------------------|-----------------|

46

47 **Table S5:** Sensitivity and Specificity of DBS filter and Mitra at Day 30 room temperature storage relative to Day 0 time point IgG  
48 responses

| Analyte    | DBS Filter Sensitivity | DBS Filter Specificity | DBS Mitra Sensitivity | DBS Mitra Specificity |
|------------|------------------------|------------------------|-----------------------|-----------------------|
| Diphtheria | 96.4% (81.7–99.9)      | 100% (73.6–100)        | 92.0% (74.0–99.0)     | 100% (73.5–100)       |
| Tetanus    | 91.2% (76.3–98.1)      | 100% (54.1–100)        | 100% (88.4–100)       | 71.4% (29.0–96.3)     |
| Pertussis  | 75.0% (34.9–96.8)      | 96.9% (83.8–99.9)      | 60.0% (14.7–94.7)     | 100% (89.1–100)       |
| Measles    | 96.9% (83.8–99.9)      | 62.5% (24.5–91.5)      | 97.3% (85.8–99.9)     | 100% (29.2–100)       |
| Mumps      | 100% (90.3–100)        | 100% (39.8–100)        | 93.3% (77.9–99.2)     | 85.7% (42.1–99.6)     |
| Rubella    | 100% (89.7–100)        | 100% (54.1–100)        | 100% (89.1–100)       | 100% (47.8–100)       |
| Varicella  | 100% (85.8–100)        | 93.8% (69.8–99.8)      | 100% (83.2–100)       | 100% (80.5–100)       |

49

50 **Table S6:** Sensitivity and Specificity of DBS filter and Mitra at stored at Room Temperature (RT) for 90 days relative to plasma IgG  
51 responses

| Analyte    | DBS Filter Sensitivity | DBS Filter Specificity | DBS Mitra Sensitivity | DBS Mitra Specificity |
|------------|------------------------|------------------------|-----------------------|-----------------------|
| Diphtheria | 69.7% (51.3–84.4)      | 98.2% (90.1–100)       | 70.3% (53.02–84.1)    | 100% (92.9–100)       |
| Tetanus    | 96.2% (89.3–99.2)      | 75.0% (34.9–96.8)      | 98.7% (93.2–100)      | 62.5% (24.5–91.5)     |
| Pertussis  | 62.5% (40.6 – 81.2)    | 100% (94.6–100)        | 42.9% (21.8–66.0)     | 100% (94.6–100)       |
| Measles    | 45.8% (25.6–67.2)      | 100% (94.3–100)        | 84.2% (74.4–91.3)     | 100% (47.8–100)       |
| Mumps      | 100% (95.7–100)        | 75.0% (19.4–99.4)      | 96.4% (89.8–99.3)     | 50.0% (6.8–93.2)      |
| Rubella    | 76.5% (65.8–85.3)      | 100% (54.1–100)        | 94.2% (87.0–98.1)     | 100% (2.5–100)        |
| Varicella  | 97.2% (90.3–99.7)      | 97.2% (90.3–99.7)      | 88.9% (79.3–95.1)     | 93.3% (68.1–99.8)     |

52

53

54 **Table S7:** Sensitivity and Specificity of DBS filter and Mitra stored at RT for >1 year relative to plasma IgG responses

| Analyte    | DBS Filter Sensitivity | DBS Filter Specificity | DBS Mitra Sensitivity | DBS Mitra Specificity |
|------------|------------------------|------------------------|-----------------------|-----------------------|
| Diphtheria | 5.9% (1.9–13.2)        | 100% (2.5–100.0)       | 10.6% (5.0–19.1)      | 100.0% (2.5–100.0)    |
| Tetanus    | 57.5% (46.4–68.0)      | _% (0.0–100.0)         | 69.0% (58.1–78.5)     | _% (0.0–100.0)        |
| Pertussis  | 3.1% (0.1–16.2)        | 100.0% (93.5–100.0)    | 25.0% (11.5–43.4)     | 100.0% (93.5–100.0)   |
| Measles    | 21.3% (12.7–32.3)      | 100.0% (73.5–100.0)    | 29.0% (19.1–40.5)     | 100.0% (71.5–100.0)   |
| Mumps      | 19.1% (11.3–29.1)      | 100.0% (29.2–100.0)    | 34.2% (24.0–45.5)     | 66.7% (9.4–99.2)      |
| Rubella    | 29.3% (19.7–40.4)      | 100.0% (47.8–100.0)    | 46.3% (35.3–57.7)     | 100.0% (47.8–100.0)   |
| Varicella  | 10.0% (4.1–19.5)       | 100.0% (80.5–100.0)    | 24.3% (14.8–36.0)     | 100.0% (80.5–100.0)   |

55
